# Supplementary material for: Prospective use of the potentiostatic triple pulse strategy for the template-free electrosynthesis of metal nanoparticles
Source: Royal Society of Chemistry journal article supplement (doi:10.1039/c4ra07787c), 2014-01-01
Supplement: c4ra07787c1.pdf [file c4ra07787c1.pdf]

Electronic Supplementary Information (ESI)

## The prospective of potentiostatic triple pulse strategy for template-free electrosynthesis of metal nanoparticles

Saurav K. Guin<sup>a</sup> and Suresh K. Aggarwal<sup>\*a</sup>

<sup>a</sup> Fuel Chemistry Division, Bhabha Atomic Research Centre, Trombay, Mumbai - 400 085,

India. Fax: +91-22-2550-5151; Tel: +91-22-2559-3740; E-mail: [skaggr2002@gmail.com](mailto:skaggr2002@gmail.com)

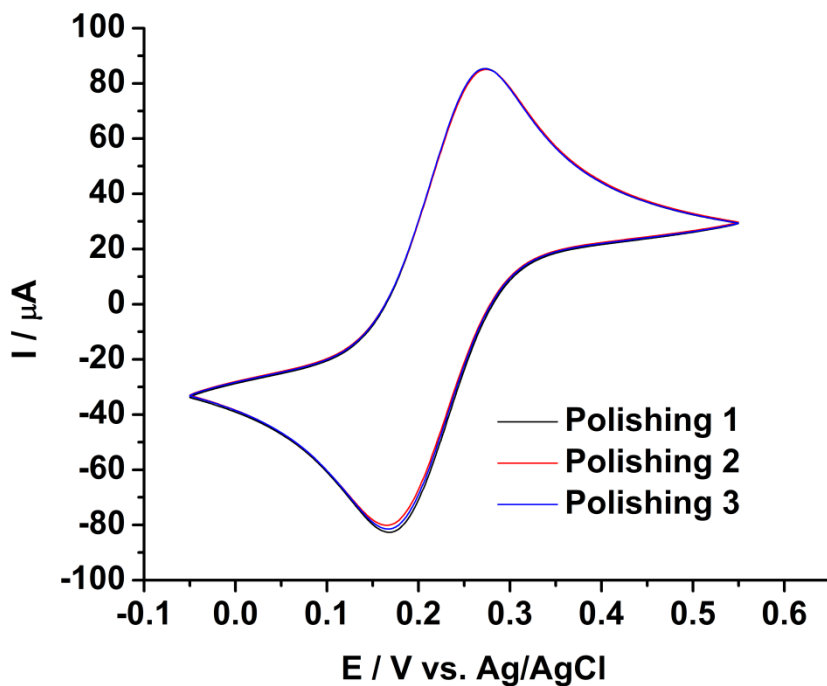

**Fig. S1** The cyclic voltammograms of 5 mM  $K_3[Fe(CN)_6]/K_4[Fe(CN)_6]$  in 0.1 M KCl at GC electrodes polished in between the experiments. Polishing -1,-2 and -3 represent the polished electrodes between the 1<sup>st</sup> and 2<sup>nd</sup>, 2<sup>nd</sup> and 3<sup>rd</sup>, and 3<sup>rd</sup> and 4<sup>th</sup> experiments, respectively.
